# Supplementary material for: Mapping optogenetically-driven single-vessel fMRI with concurrent neuronal calcium recordings in the rat hippocampus
Source: PubMed Central journal article supplement (PMC6868210; doi:10.1038/s41467-019-12850-x), 2019-11-20
Supplement: 41467_2019_12850_MOESM1_ESM.pdf [file 41467_2019_12850_MOESM1_ESM.pdf]

# Supplementary information

**Mapping optogenetically-driven single-vessel fMRI with concurrent neuronal calcium recordings in the rat hippocampus**

Chen et al.

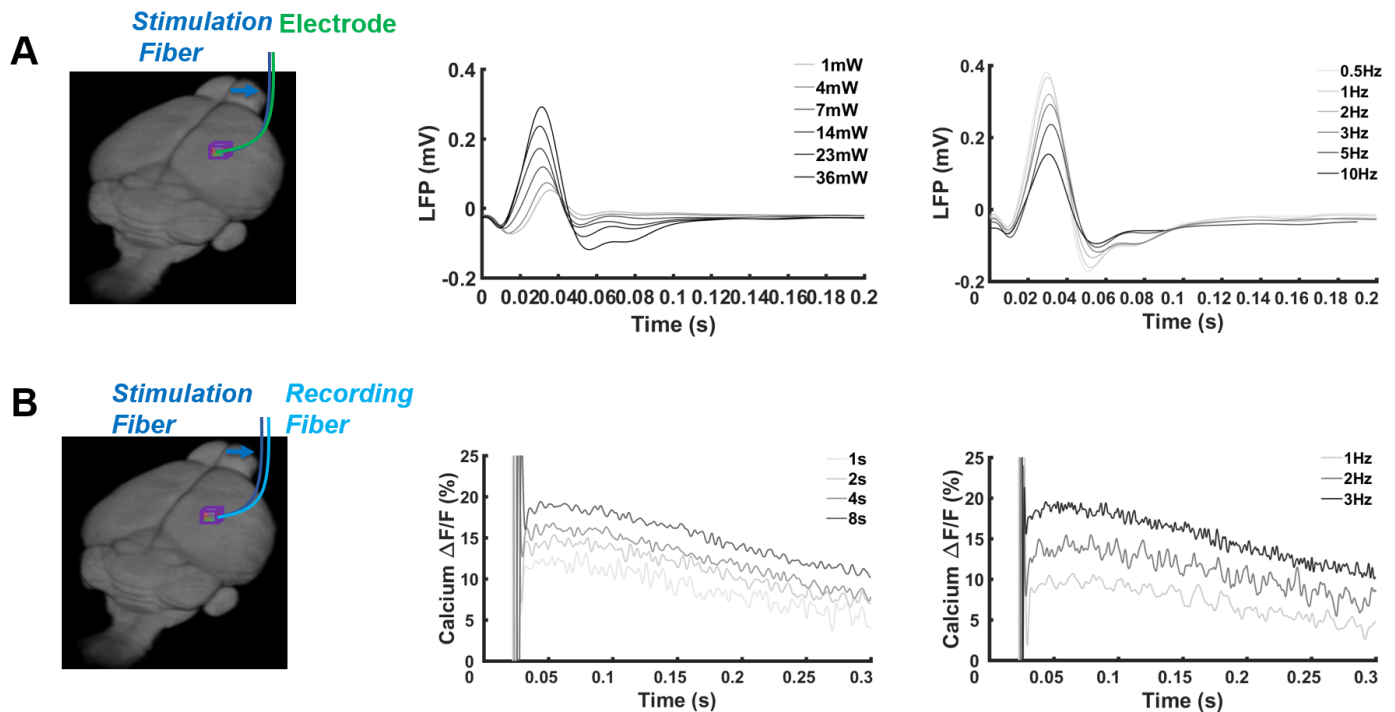

**Supplementary Figure 1. Optogenetically evoked LFP and GCamp6f-mediated  $\text{Ca}^{2+}$  recording in the hippocampus.**

**A.** Optogenetically evoked LFP traces with 10 ms light pulse stimulation at different powers (1-36 mW) averaged from trails with 3 Hz light pulse stimulation paradigm and frequencies (0.5-10 Hz) averaged from trails with 14 mW power of the light pulse (4 s on with 16 s off repeated for 20 times).

**B.** Optogenetically evoked neuronal  $\text{Ca}^{2+}$  traces with 10 ms light pulse stimulation at different stimulation on durations (1, 2, 4, 8 s) and frequencies (1-3 Hz) from experimental trails with each epoch in 20 s (1-4s on) and 45 s (8s on) repeated for 20 times.

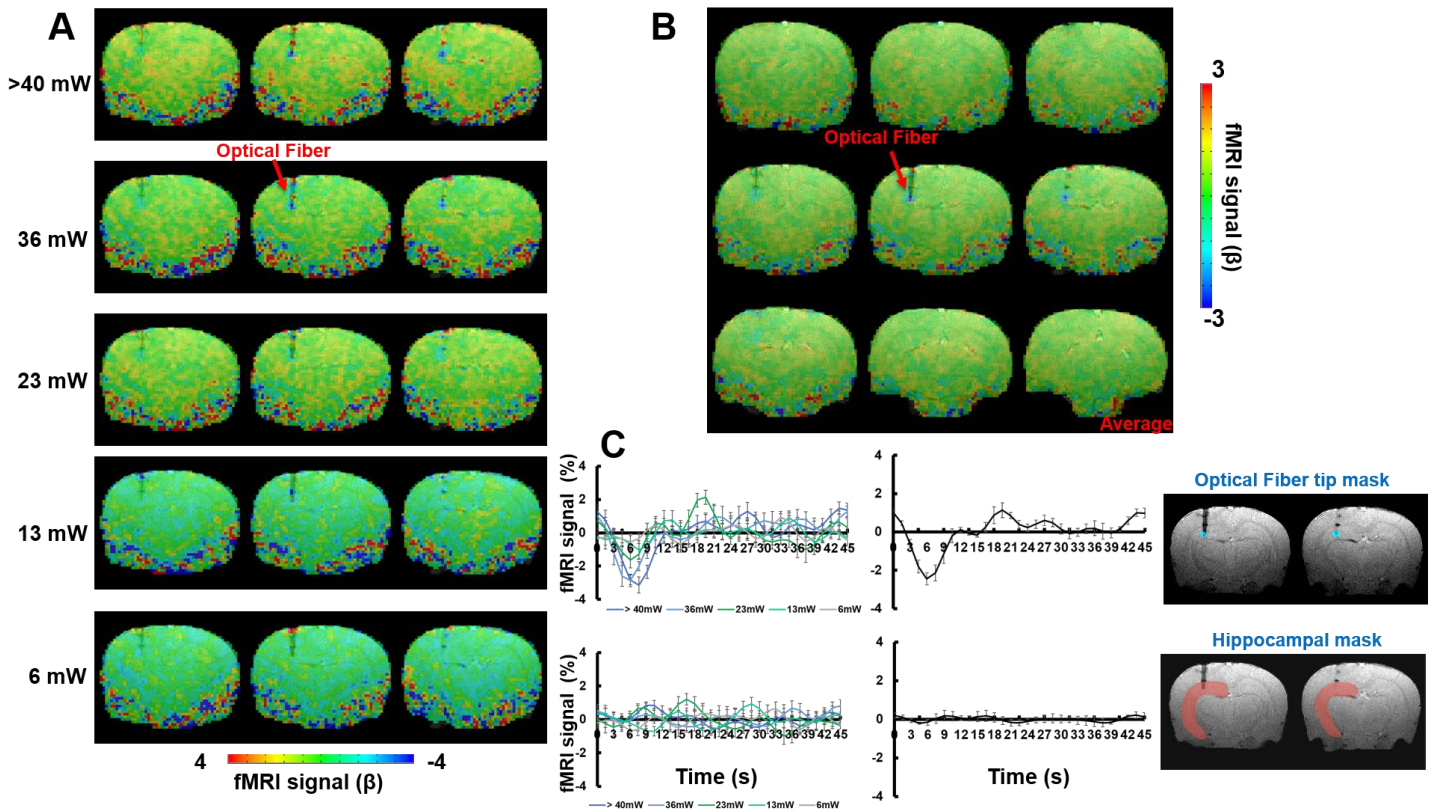

**Supplementary Figure 2. Blue light-evoked B0 offset-induced MRI signal changes close to the fiber tip in the naive rat hippocampus.**

**A.** Representative color-coded EPI-fMRI maps at different powers (6->40 mW) (illumination: 10 ms light pulse, 10 Hz, 8 s).

**B.** Averaged color-coded EPI-fMRI map from different powers (13, 23, 36, >40 mW) (illumination: 10 ms light pulse, 10 Hz, 8 s).

**C.** Averaged EPI-fMRI time courses from optical fiber tip (upper) and hippocampus (lower) at different stimulation powers (6->40 mW), averaged EPI-fMRI time courses from all the different powers (23, 36, >40 mW) (middle), and ROIs in blue contour (optic fiber tip) and red contour (hippocampus) of the MRI images (right).

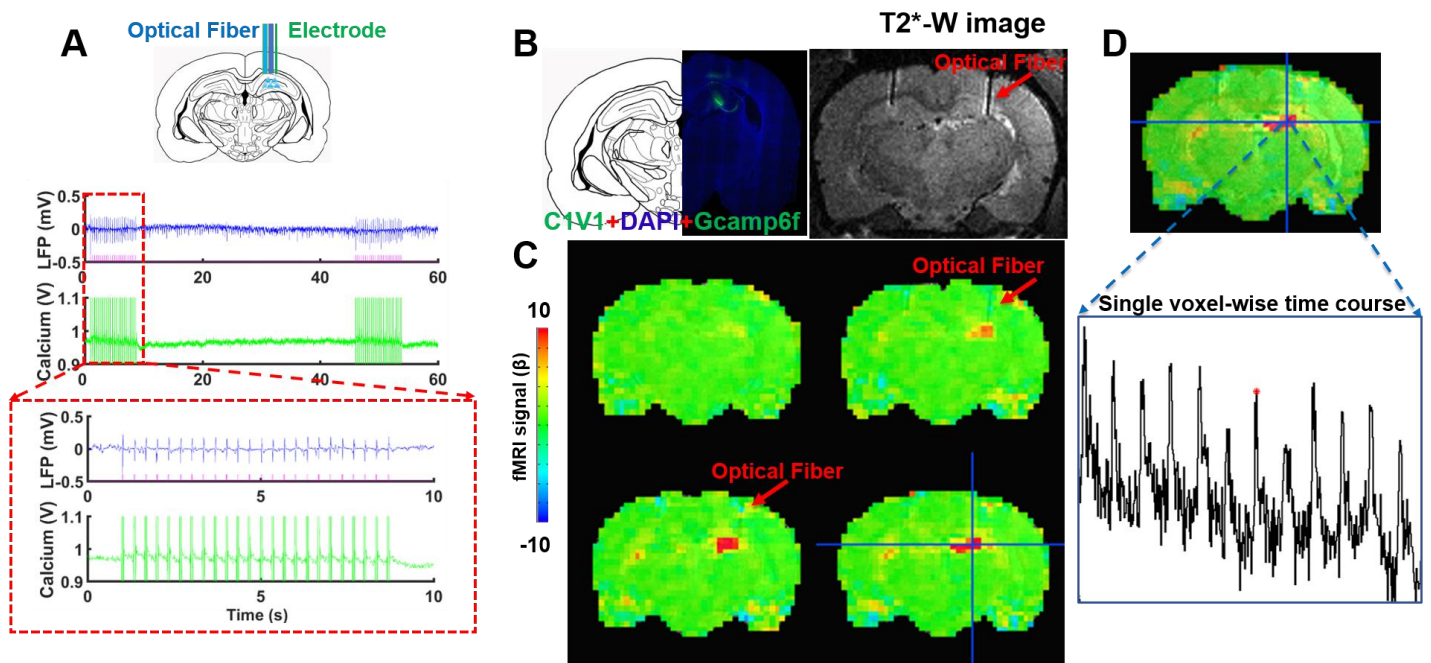

**Supplementary Figure 3. Simultaneous C1V1-evoked GCamp6f-mediated Ca<sup>2+</sup> recording with LFP or EPI-fMRI in the hippocampus.**

**A.** Simultaneous LFP (blue) and Ca<sup>2+</sup> signal (green) traces from neurons expressing C1V1 in the hippocampus with optogenetic stimulation (illumination: 10 ms light pulse, 3 Hz, 8 s, 5 mW, 590 nm) with enlarged view outlined in the red box.

**B.** Immunohistological staining of C1V1 and Gcamp6f co-expressed in the hippocampus (left), and the T2\*-weighted (T2\*-W) image shows the optical fiber (red arrow) inserted into the hippocampus.

**C.** A representative color-coded BOLD-fMRI map shows the optogenetically activated hippocampus through C1V1 (illumination: 10 ms light pulse, 3 Hz, 8 s, 5 mW, 590 nm).

**D.** The BOLD-fMRI time course from a single voxel in hippocampus is plotted in a block-design paradigm (12 epochs).

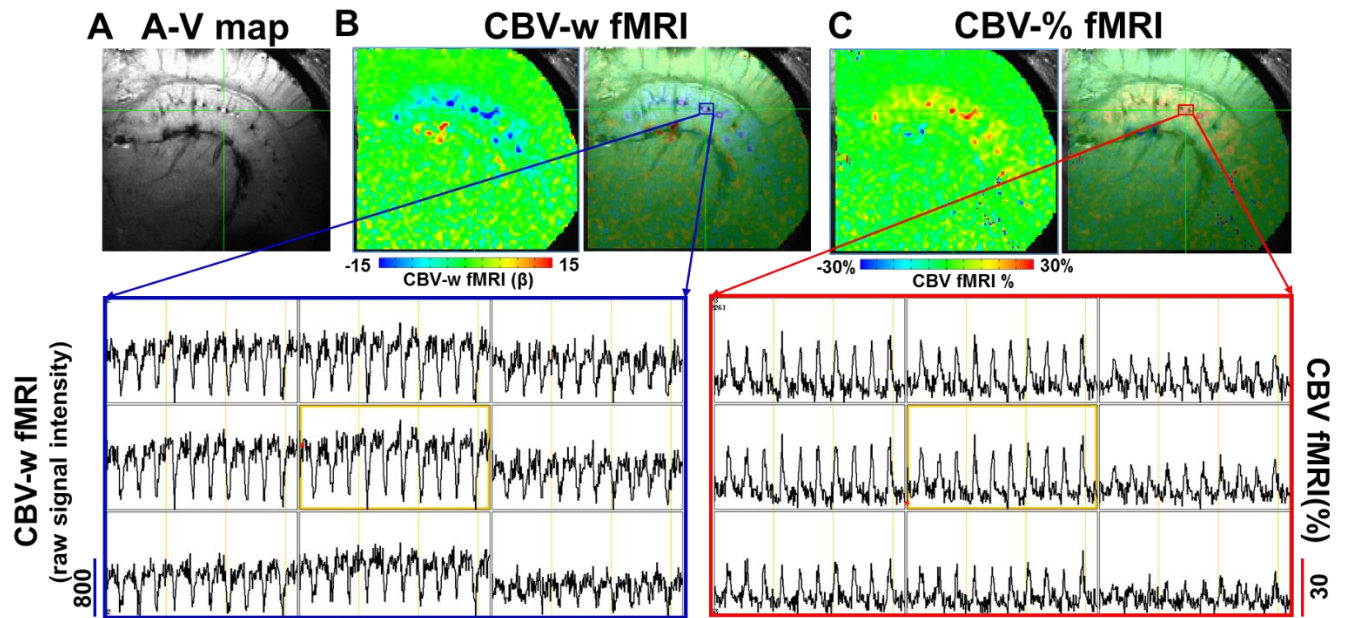

**Supplementary Figure 4. The Optogenetically driven hippocampal single-vessel CBV % map.**

**A.** Representative 2D A-V map of the hippocampal vasculature.

**B.** The CBV-weighted fMRI map shows the T2\*-weighted signal changes from the individual hippocampal arterioles (bright dots). The time courses of the CBV-w signal from arterioles voxels (3x3 windows, blue box) show the negative signal changes per epoch of the stimulation paradigm.

**C.** The CBV % fMRI map shows the percent CBV signal changes from the individual hippocampal arterioles (bright dots). The time courses of the CBV % signal from arterioles voxels (3x3 windows, red box) show the positive signal changes per epoch of the stimulation paradigm.

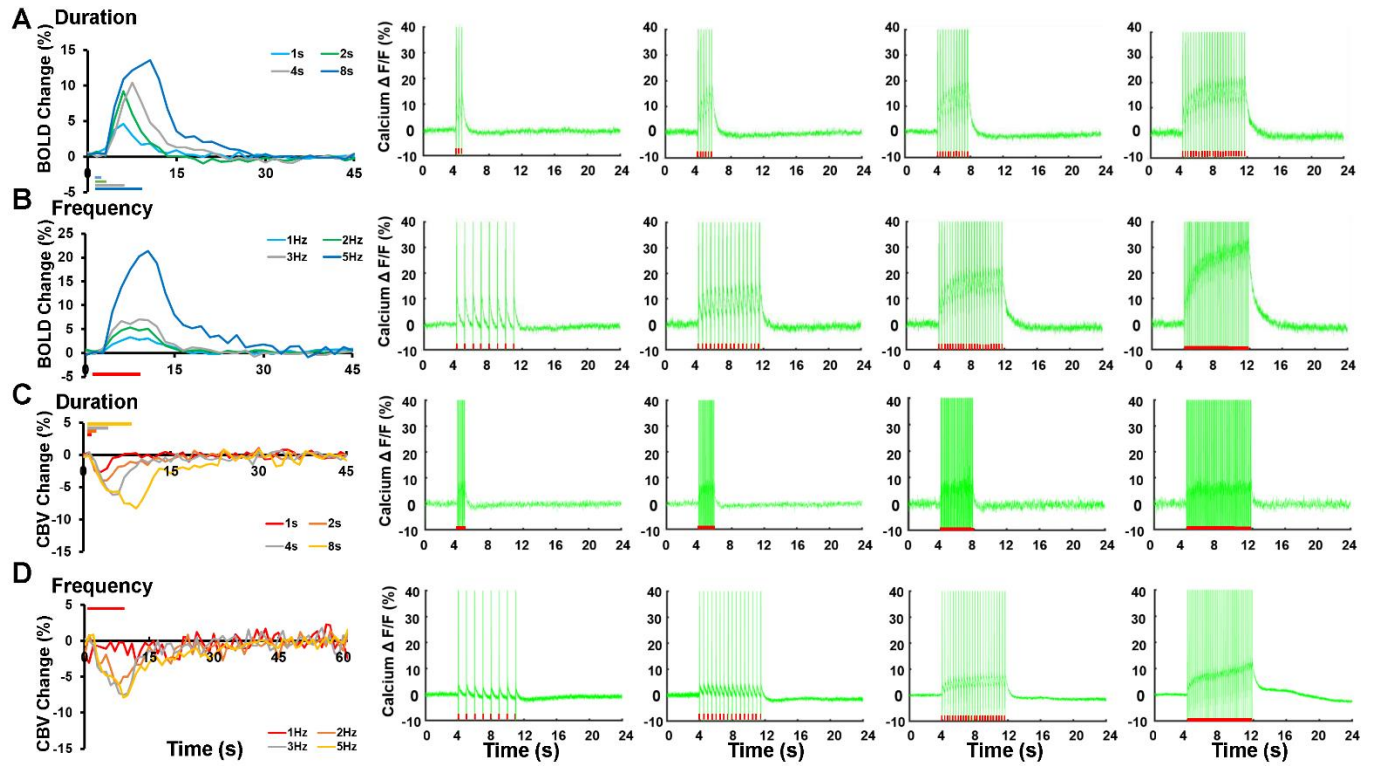

**Supplementary Figure 5. Simultaneous single-vessel BOLD/CBV fMRI and  $\text{Ca}^{2+}$  recordings in the hippocampus with different optogenetic stimulation paradigms.**

- A.** Stimulation duration-dependent BOLD-fMRI with concurrent  $\text{Ca}^{2+}$  recordings (1, 2, 4, 8 s).
- B.** Stimulation frequency-dependent BOLD-fMRI with concurrent  $\text{Ca}^{2+}$  recordings (1, 2, 3, 5 Hz).
- C.** Stimulation duration-dependent CBV-fMRI with concurrent  $\text{Ca}^{2+}$  recordings (1, 2, 4, 8 s).
- D.** Stimulation frequency-dependent CBV-fMRI with concurrent  $\text{Ca}^{2+}$  recordings (1, 2, 3, 5 Hz).

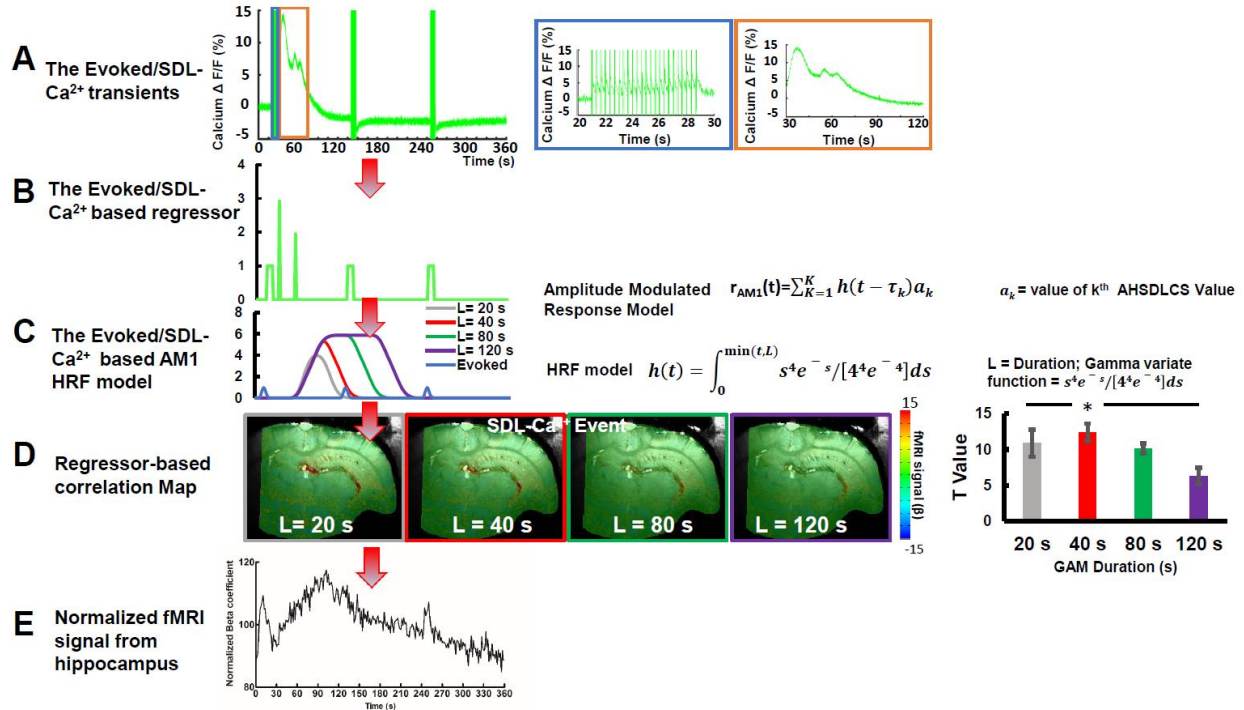

**Supplementary Figure 6. The flow diagram to calculate the SDL- $\text{Ca}^{2+}$  signal-based single-vessel BOLD fMRI correlation map.**

**A.** Neuronal  $\text{Ca}^{2+}$  signals and single-vessel BOLD fMRI signals were acquired simultaneously during SDL- $\text{Ca}^{2+}$  events. A representative time course of the neuronal  $\text{Ca}^{2+}$  signal shows the optogenetically evoked  $\text{Ca}^{2+}$  signal and the SDL- $\text{Ca}^{2+}$  signal with enlarged views of these two events (blue and orange box).

**B.** Peak timing and amplitudes of the optogenetically evoked and SDL- $\text{Ca}^{2+}$  events were used to create the regressors for the single-vessel BOLD fMRI correlation.

**C.** Amplitude modulated BOLD response models are generated base on the Evoked/SDL- $\text{Ca}^{2+}$ -based regressors. The ideal functions (HRF models) of the representative time course of Evoked/SDL- $\text{Ca}^{2+}$  signal are represented with varied duration (L).

**D.** Voxel-wise correlation maps of the single-vessel BOLD fMRI signal with the simultaneously acquired neuronal  $\text{Ca}^{2+}$  signal with the HRF models at varied duration (L), showing t statistic values at L=40 s (ANOVA, one way,  $F=4.93$ ,  $p=0.013$ ,  $n=5$ ).

**E.** A representative time course of the single-vessel BOLD fMRI signal from the hippocampus shows the positive fMRI signal correlated to the occurrence of the SDL- $\text{Ca}^{2+}$  signal.
